# Supplementary material for: Pseudocapacitance of MXene nanosheets for high-power sodium-ion hybrid capacitors
Source: PubMed Central journal article supplement (PMC4396360; doi:10.1038/ncomms7544), 2015-04-02
Supplement: ncomms7544-s1.pdf [file ncomms7544-s1.pdf]

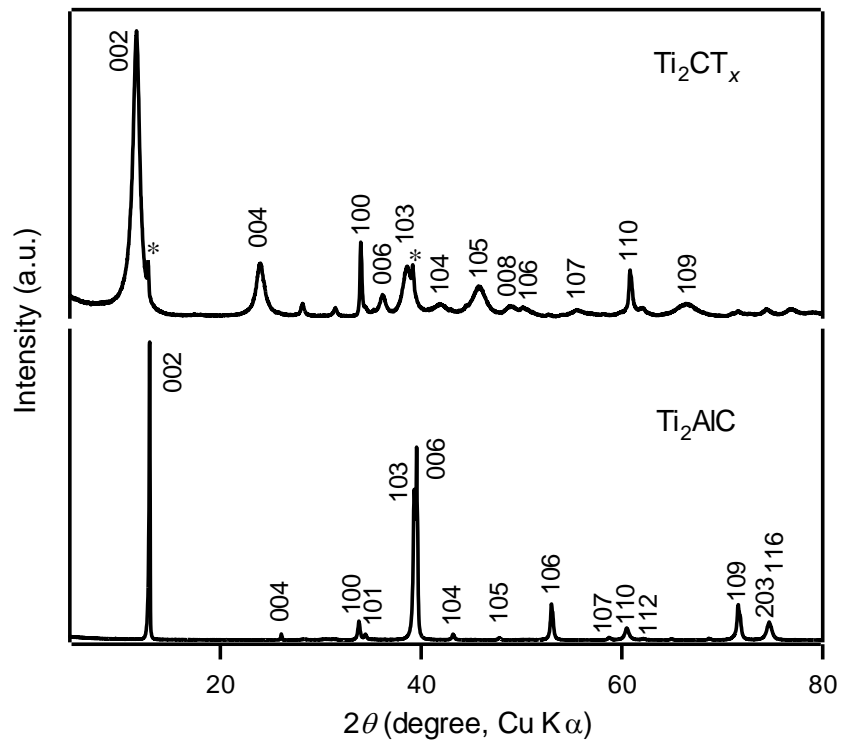

Supplementary Figure 1. Powder X-ray diffraction patterns for  $\text{Ti}_2\text{AlC}$  and  $\text{Ti}_2\text{CT}_x$ .

(a)

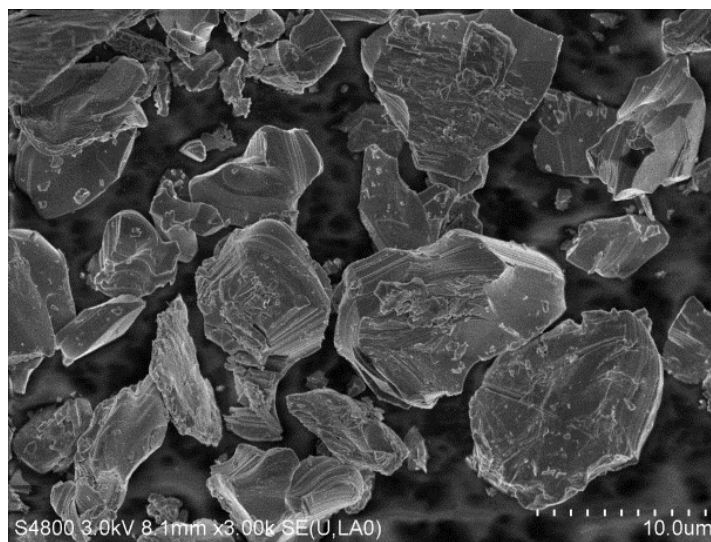

(b)

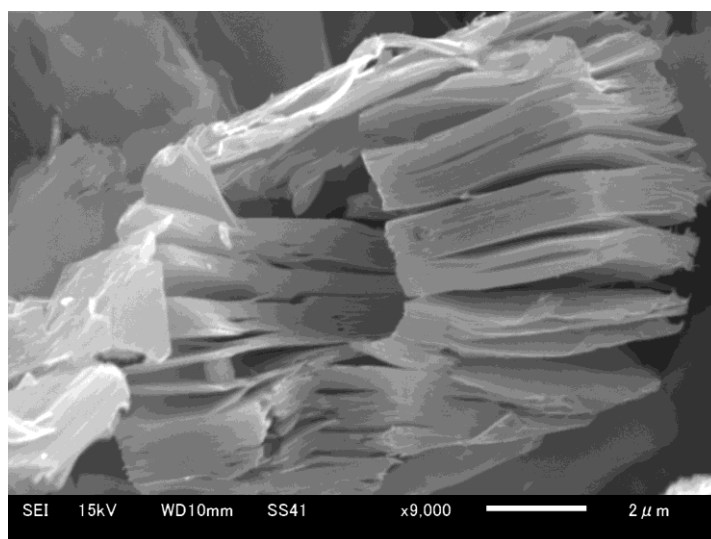

Supplementary Figure 2. SEM images for (a)  $\text{Ti}_2\text{AlC}$  and (b)  $\text{Ti}_2\text{CT}_x$ .

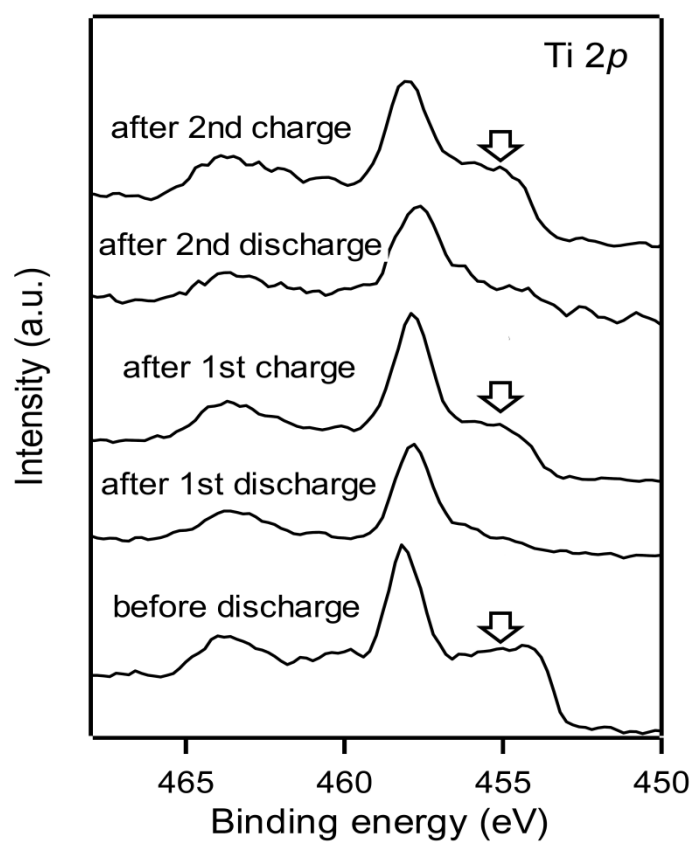

Supplementary Figure 3. *Ex situ* XPS spectra of  $\text{Ti}_2\text{CT}_x$  during charge–discharge.

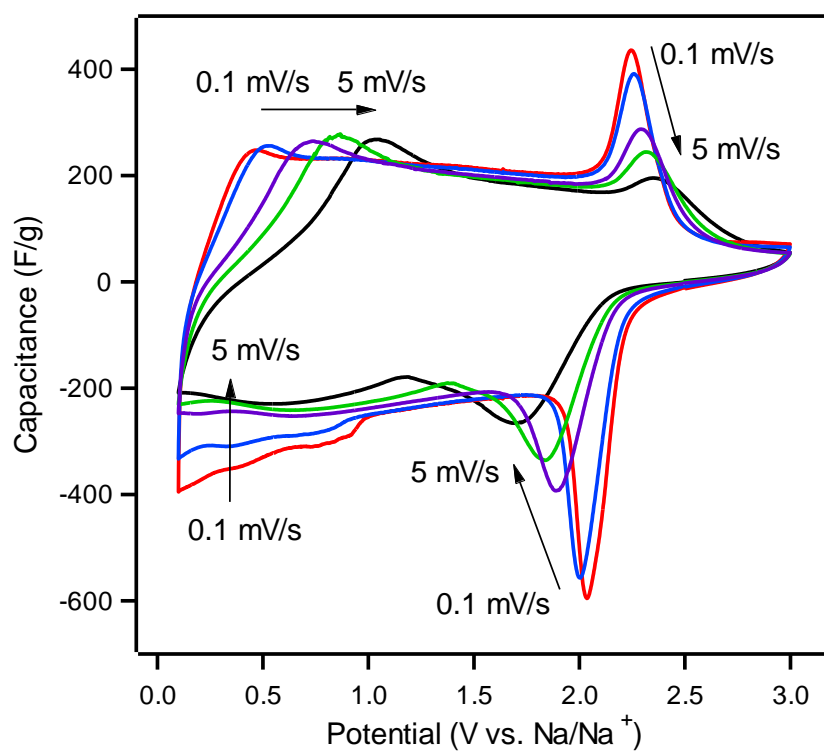

Supplementary Figure 4. Cyclic voltammograms at various scan rates. The thickness of the film electrode is *ca.* 50  $\mu\text{m}$ . The gravimetric capacitance in  $\text{F g}^{-1}$  is calculated by  $j/s$  where  $j$  is the specific current [ $\text{A g}^{-1}$ ] and  $s$  is the sweep rate [ $\text{V s}^{-1}$ ].

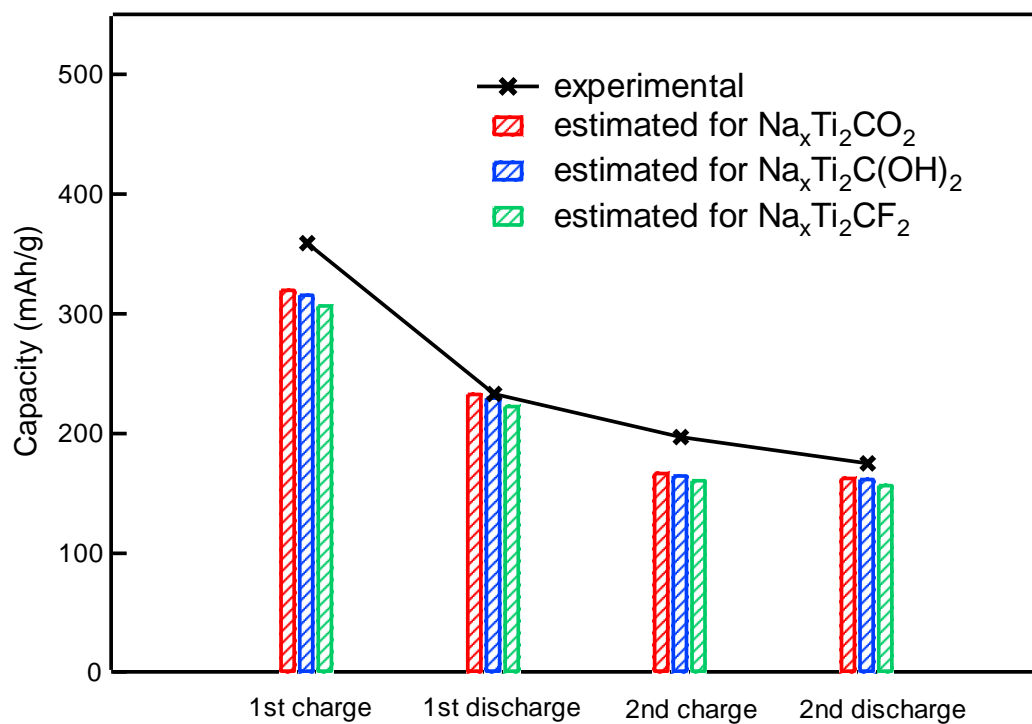

Supplementary Figure 5. Comparison between the experimental charge-discharge capacity and estimated capacity based on the Na/Ti ratio from EDX. The possible nominal chemical formulas of  $\text{Ti}_2\text{CT}_x$  ( $\text{Ti}_2\text{CO}_2$ ,  $\text{Ti}_2\text{C(OH)}_2$ , and  $\text{Ti}_2\text{CF}_2$ ) were assumed to estimate the capacity.

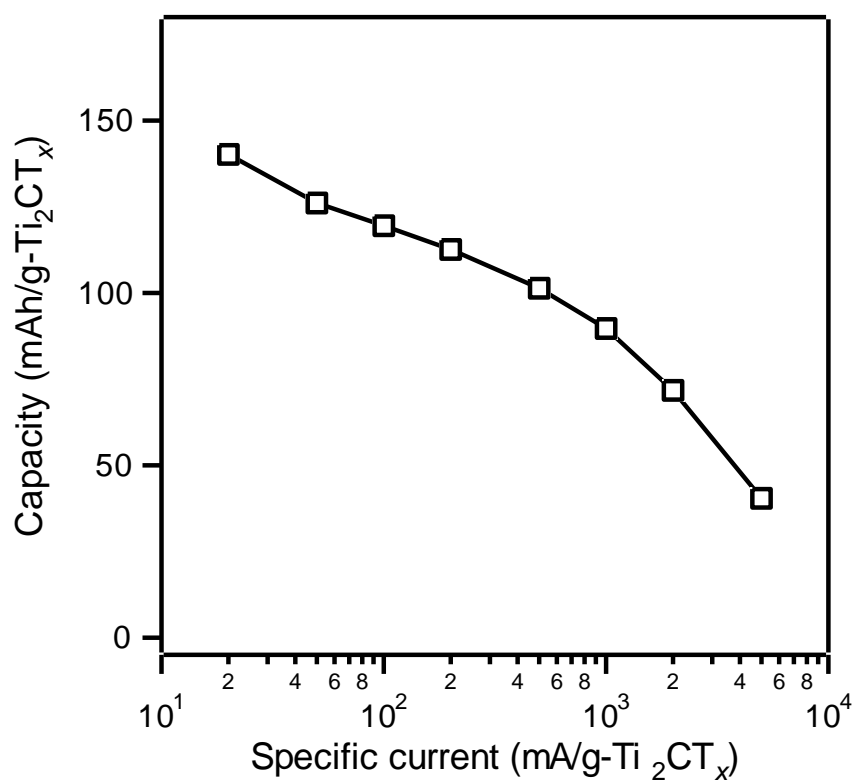

Supplementary Figure 6. Rate capability of  $\text{Ti}_2\text{CT}_x$ -alluaudite  $\text{Na}_2\text{Fe}_2(\text{SO}_4)_3$  full cell.

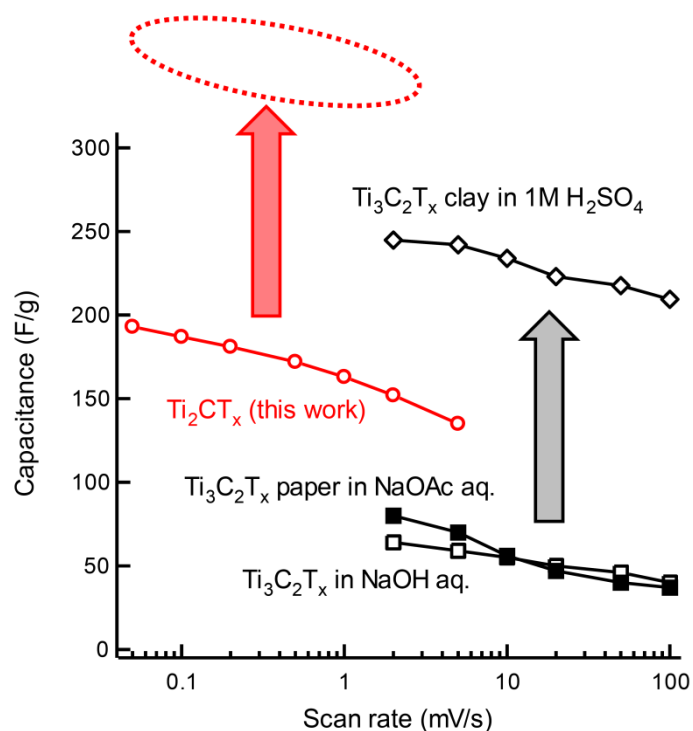

Supplementary Figure 7. Comparison of the rate performance of Ti<sub>2</sub>CT<sub>x</sub> in nonaqueous Na<sup>+</sup> electrolyte, and previously reported Ti<sub>3</sub>C<sub>2</sub>T<sub>x</sub> electrodes<sup>23,36</sup>. The gravimetric capacitance in F g<sup>-1</sup> from the cyclic voltammetry is given by  $C = \frac{1}{\Delta V} \int \frac{j}{s} dV$ , where  $C$  is the gravimetric capacitance,  $j$  is the specific current in A g<sup>-1</sup>,  $s$  is the scan rate [V s<sup>-1</sup>],  $V$  is the voltage in V, and  $\Delta V$  is the voltage window. The red arrow indicates a perspective of further improvement of the Ti<sub>2</sub>CT<sub>x</sub> electrode by adopting the new synthetic procedure in ref. 36.

Supplementary Table 1. Atomic ratio of Na and Ti in MXene Ti<sub>2</sub>C electrode during the initial two cycles.

|                           | Na/Ti |
|---------------------------|-------|
| 1st charge                | 0.84  |
| 1st discharge             | 0.23  |
| 2nd charge                | 0.67  |
| 2 <sup>nd</sup> discharge | 0.24  |



Supplementary Table 2.  $c$  parameters calculated from the (002) peak during charge and discharge.

| MXene                           | electrolyte               | state                  | Na <sup>+</sup> content | interlayer distance / Å | $c$ / Å | reference |
|---------------------------------|---------------------------|------------------------|-------------------------|-------------------------|---------|-----------|
| Ti <sub>2</sub> CT <sub>x</sub> | NaPF <sub>6</sub> /EC-DEC | as prepared            | 0.0                     | 7.65                    | 15.30   | This work |
|                                 |                           | electrolyte immersion  | 0.0                     | 7.71                    | 15.42   | This work |
|                                 |                           | 0.7 V at 1st charge    | 0.3                     | 10.20                   | 20.39   | This work |
|                                 |                           | 0.1 V at 1st charge    | 1.7                     | 10.08                   | 20.16   | This work |
|                                 |                           | 3.0 V at 1st discharge | 0.5                     | 10.21                   | 20.42   | This work |
|                                 |                           | 0.1 V at 2nd charge    | 1.3                     | 10.14                   | 20.29   | This work |
|                                 |                           | 3.0 V at 2nd discharge | 0.5                     | 10.11                   | 20.21   | This work |
| MXene                           | electrolyte               | state                  | Li <sup>+</sup> content | interlayer distance / Å | $c$ / Å | reference |
| Ti <sub>2</sub> CT <sub>x</sub> | LiPF <sub>6</sub> /EC-DMC | as prepared            | 0.0                     | 7.73                    | 15.46   | Ref. [28] |
|                                 |                           | 0.05 V at 1st charge   | 1.6                     | 9.36                    | 18.72   | Ref. [28] |
|                                 |                           | 2.7 V at 1st discharge | 0.8                     | 8.98                    | 17.96   | Ref. [28] |
